# Supplementary material for: Grafting titanate nanotubes with 3-aminopropyltriethoxysilane for enhanced CO 2 adsorption
Source: Royal Society of Chemistry journal article supplement (doi:10.1039/d5dt02443a), 2026-01-01
Supplement: d5dt02443a1.pdf [file d5dt02443a1.pdf]

## Supplementary information

### Grafting titanate nanotubes with 3-aminopropyltriethoxysilane for enhanced CO<sub>2</sub> adsorption

Cynthia Barreto<sup>1</sup>; Edison Morgado Jr.<sup>1</sup>; Khrissy Medeiros<sup>1</sup>; Marianne Diniz<sup>1</sup>; Marcelo Maia<sup>2</sup>; Aryandson da Silva<sup>3</sup>; Sibebe B. C. Pergher<sup>3</sup>, Deane Mesquita Roehl<sup>4</sup> and Bojan A. Marinkovic<sup>1\*</sup>

<sup>1</sup>*Department of Chemical and Materials Engineering, Pontifical Catholic University of Rio de Janeiro (PUC-Rio), 22453-900, Rio de Janeiro, RJ, Brazil*

<sup>2</sup>*Department of Physics, Pontifical Catholic University of Rio de Janeiro (PUC-Rio), 22453-900, Rio de Janeiro, RJ, Brazil*

<sup>3</sup>*Department of Chemistry, Federal University of Rio de Grande do Norte (UFRN), 59072-970, Natal, RN, Brazil*

<sup>4</sup>*Department of Civil Engineering, Pontifical Catholic University of Rio de Janeiro (PUC-Rio), 22453-900, Rio de Janeiro, RJ, Brazil*

*\*e-mail: bojan@puc-rio.br*

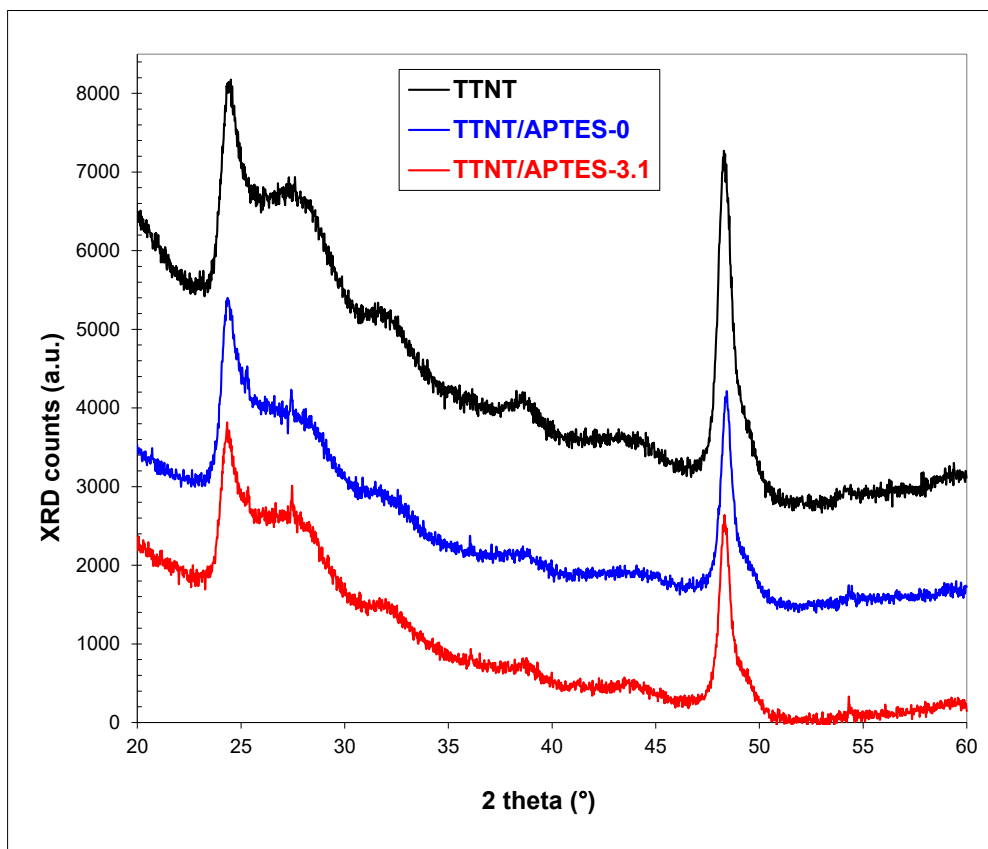

**Figure S1** – XRD patterns of pristine TTNT and after treatment with and without APTES.

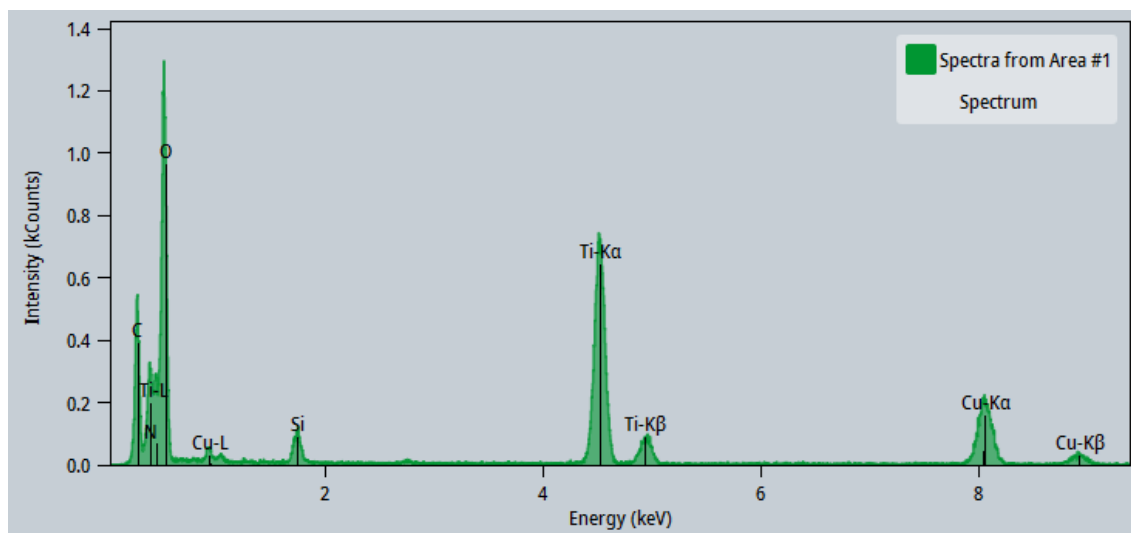

| Z  | Element |   | Atomic Fraction (%) | % Error | Mass Fraction (%) | %Error |
|----|---------|---|---------------------|---------|-------------------|--------|
| 6  | C       | K | 31.62               | 2.96    | 18.02             | 1.79   |
| 7  | N       | K | 3.75                | 0.99    | 2.49              | 0.67   |
| 8  | O       | K | 42.90               | 5.17    | 32.56             | 5.05   |
| 14 | Si      | K | 2.56                | 0.54    | 3.42              | 0.72   |
| 22 | Ti      | K | 19.16               | 3.11    | 43.51             | 5.06   |

**Figure S2** – EDS spectra and element analysis of APTES modified sample (TTNT/APTES-3.1)

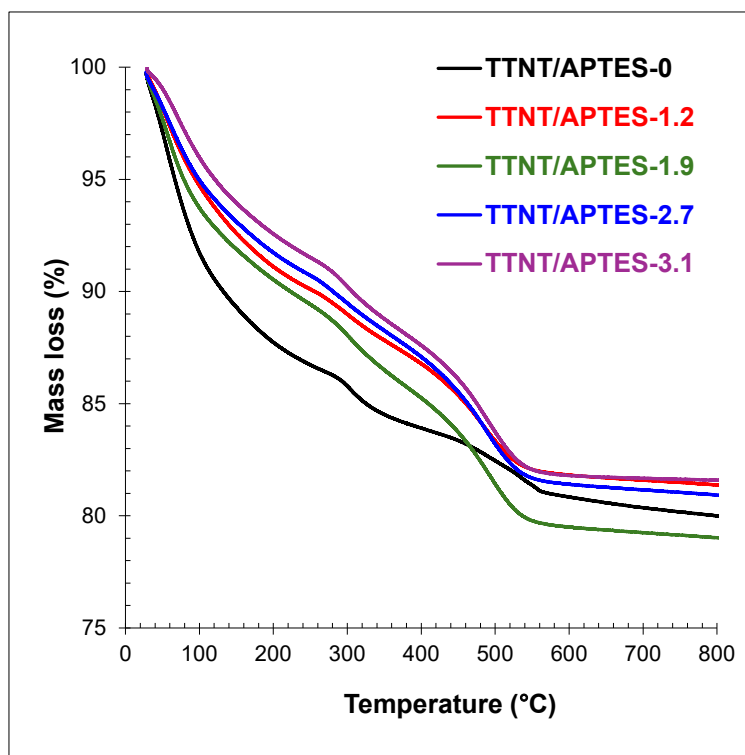

**Figure S3** – TGA plots of the studies sample TTNT

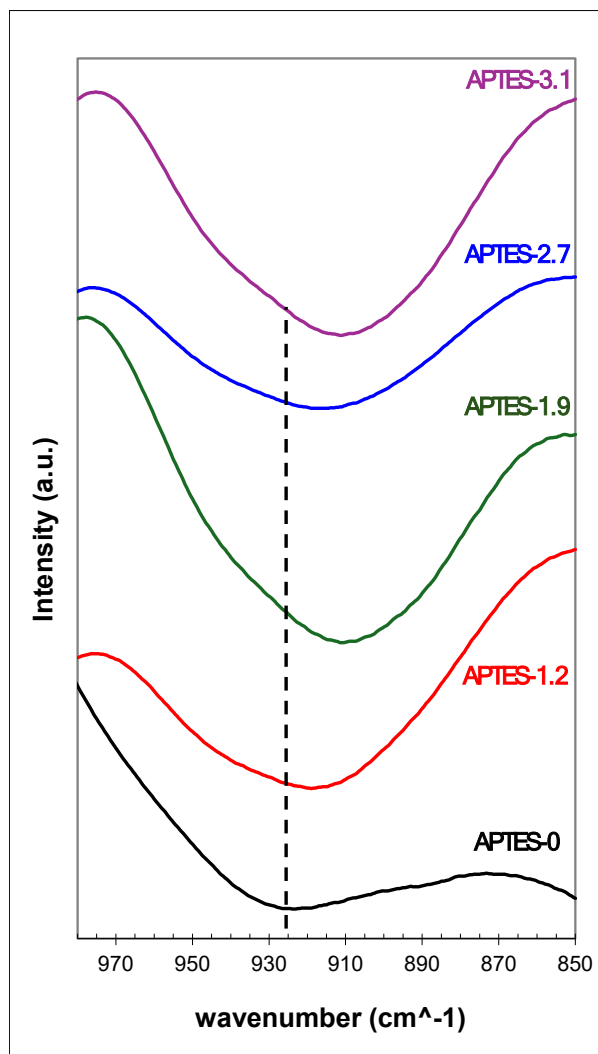

**Figure S4:** FTIR vibrational spectra, zooming the spectral region 850-1000  $\text{cm}^{-1}$ .

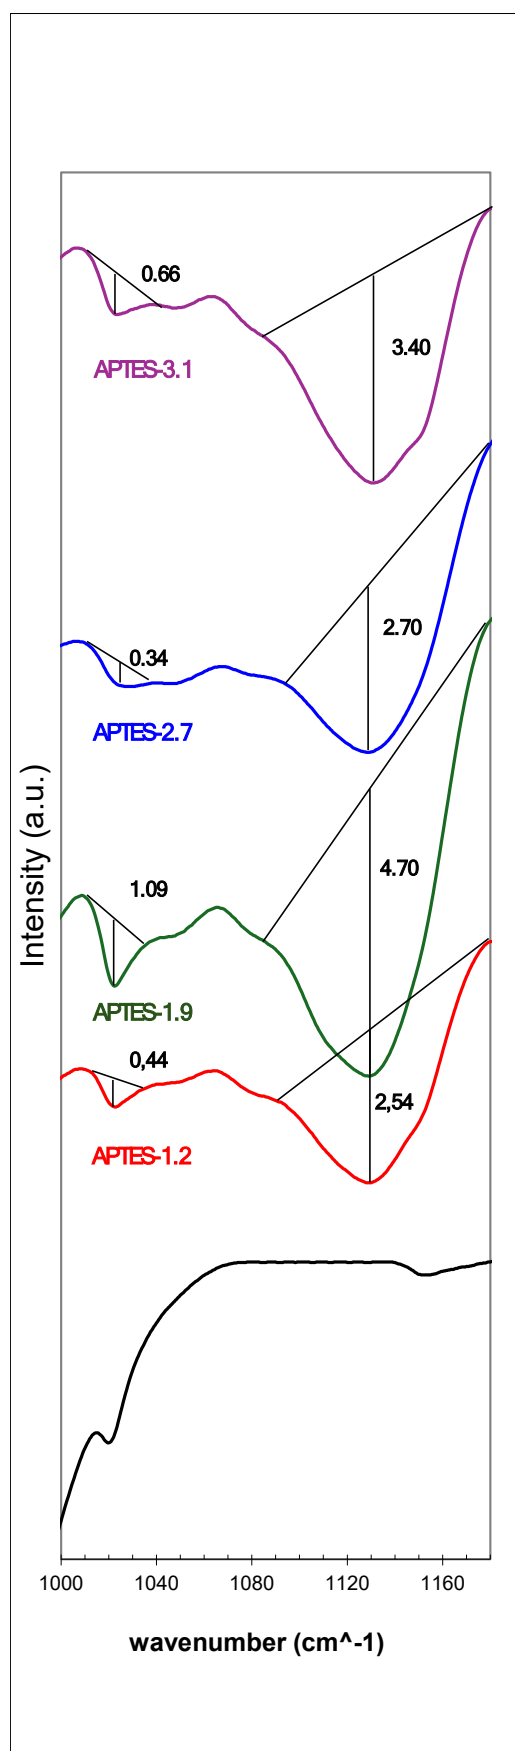

**Figure S5:** FTIR vibrational spectra, zooming the spectral region of Si-O-Si bond absorptions

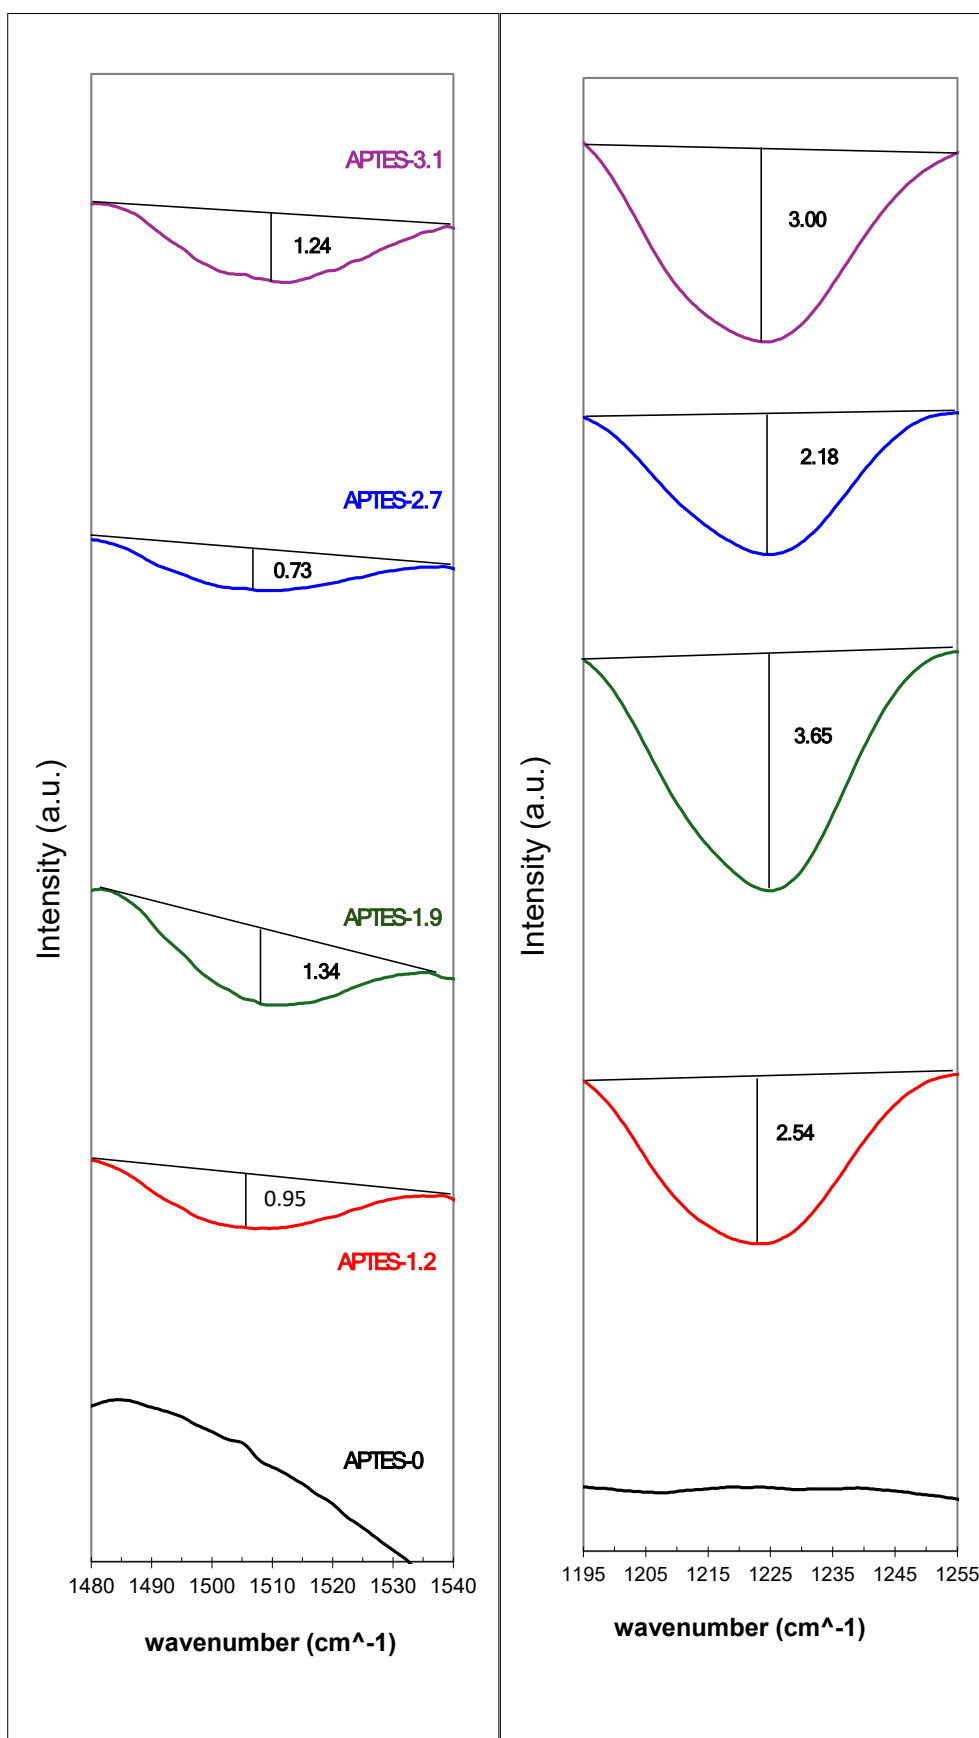

**Figure S6:** FTIR vibrational spectra, zooming the spectral region of bending vibration H-bonded NH<sub>2</sub> (~1511 cm<sup>-1</sup>) and of stretching C-N vibration (~1224 cm<sup>-1</sup>)

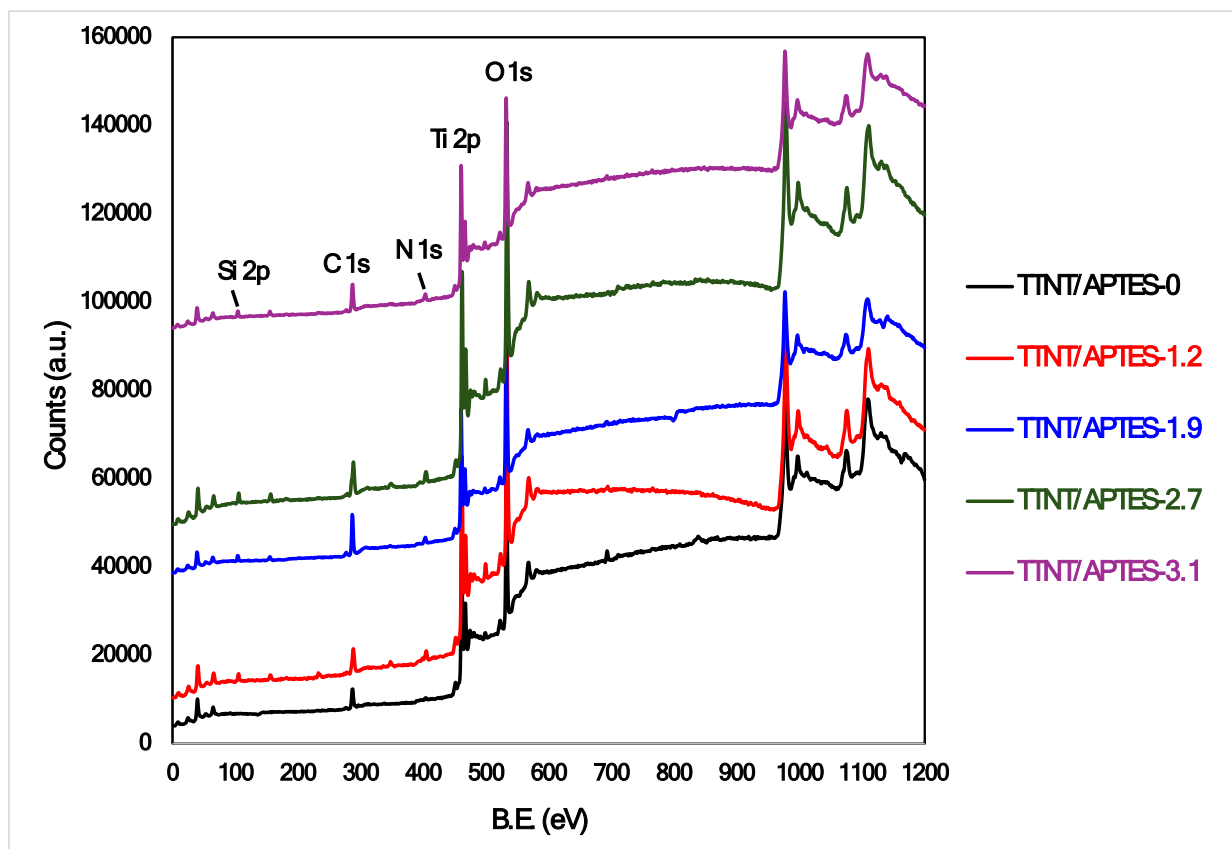

**Figure S7:** XPS spectra of the samples studied



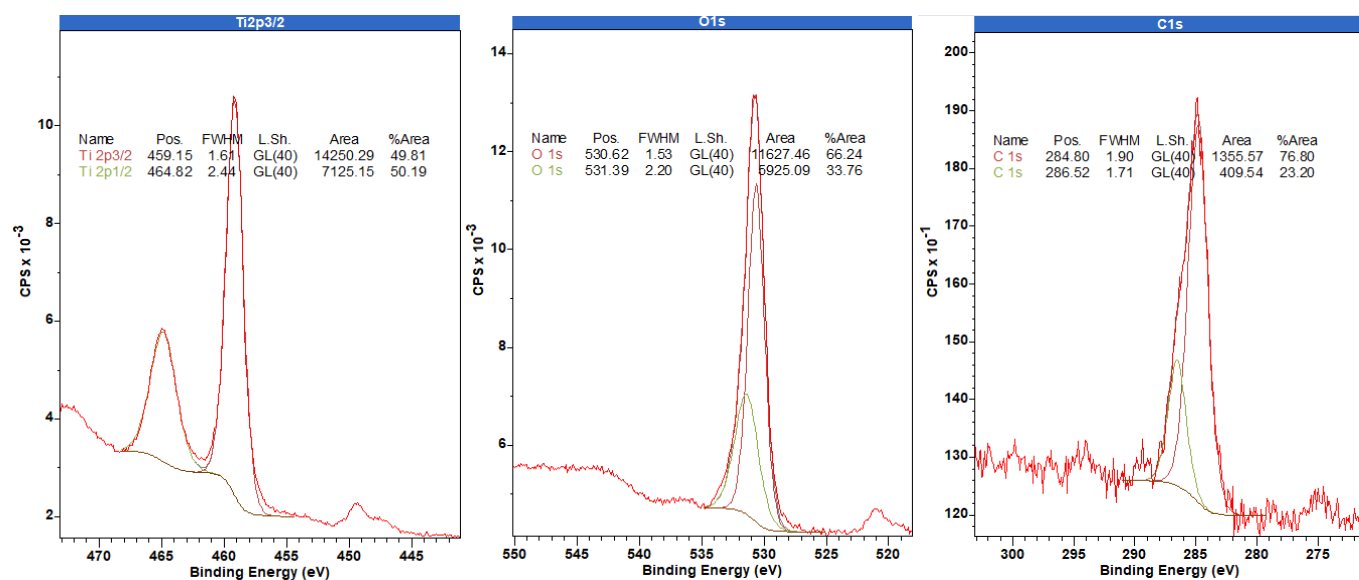

Figure S8(A) - XPS spectra with deconvoluted peaks of sample TTNT/APTES-0

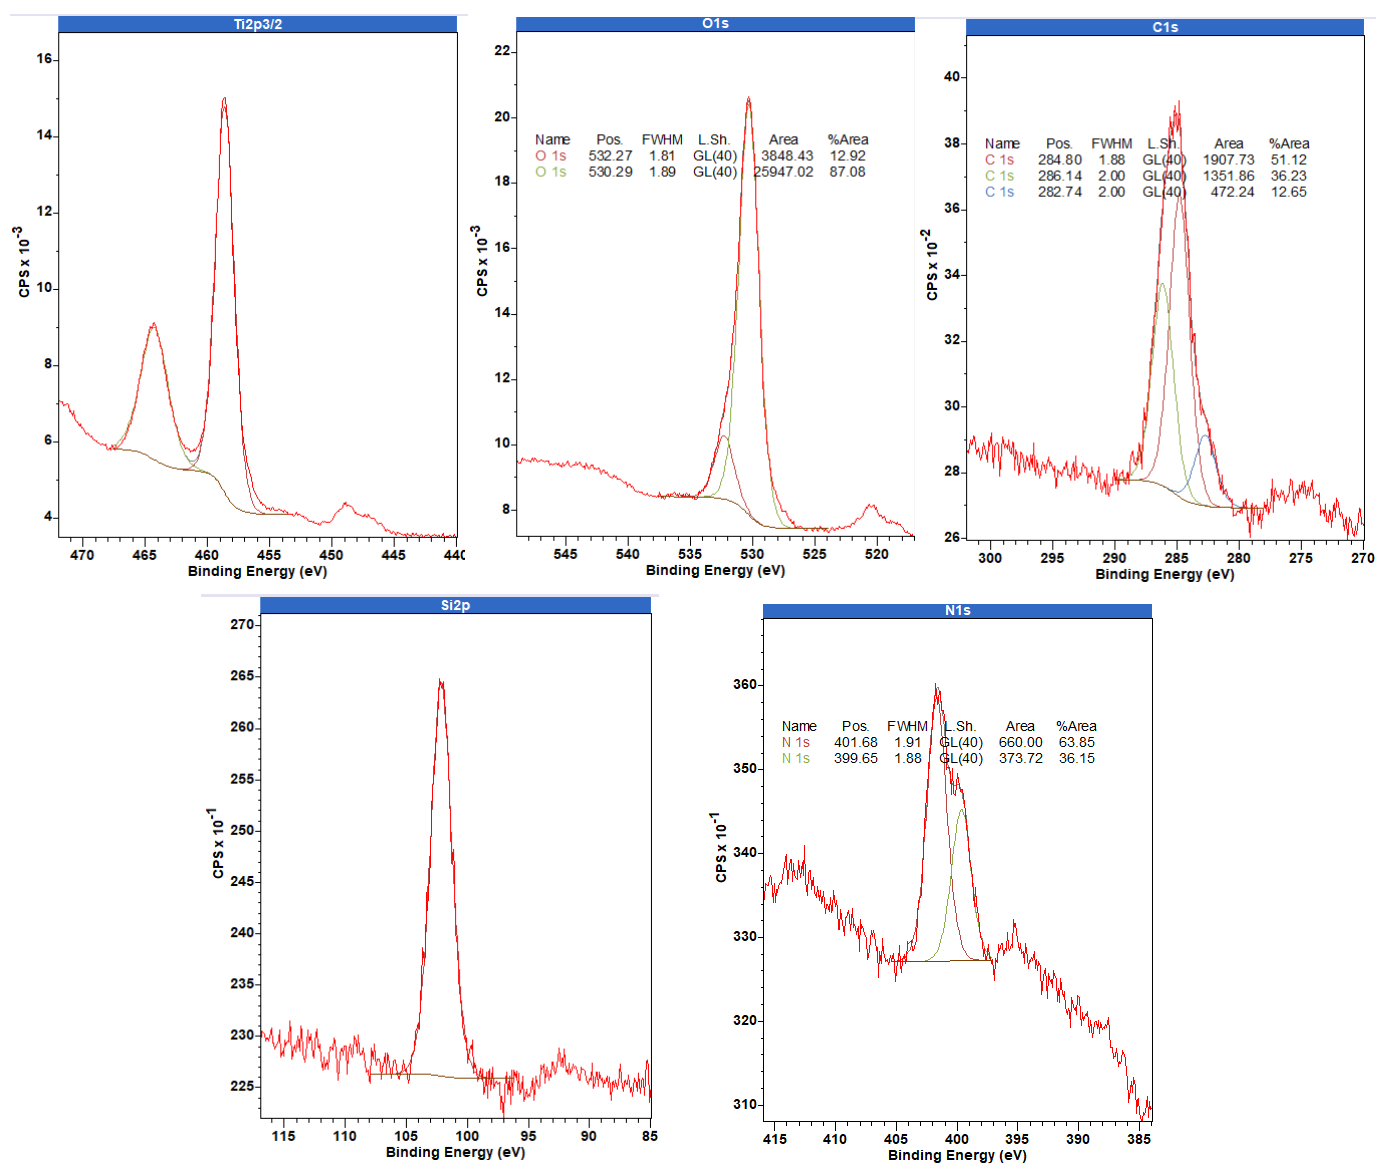

Figure S8(B) - XPS spectra with deconvoluted peaks of sample TTNT/APTES-1.2

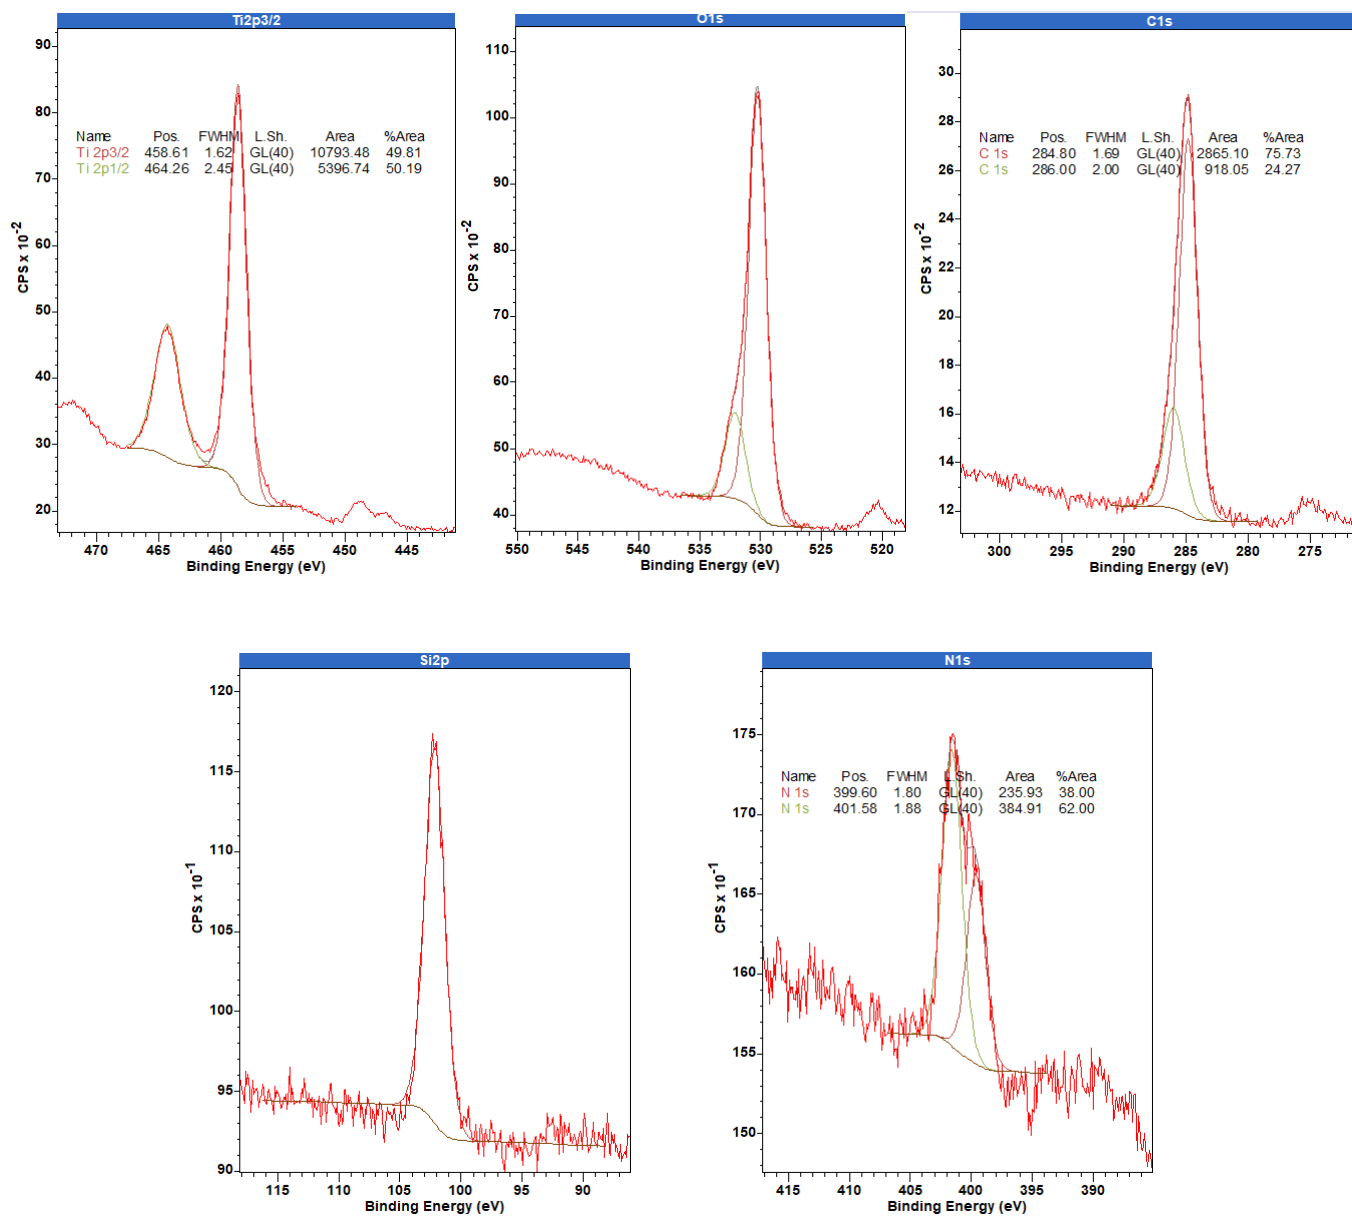

**Figure S8(C)** - XPS spectra with deconvoluted peaks of sample TTNT/APTES-1.9

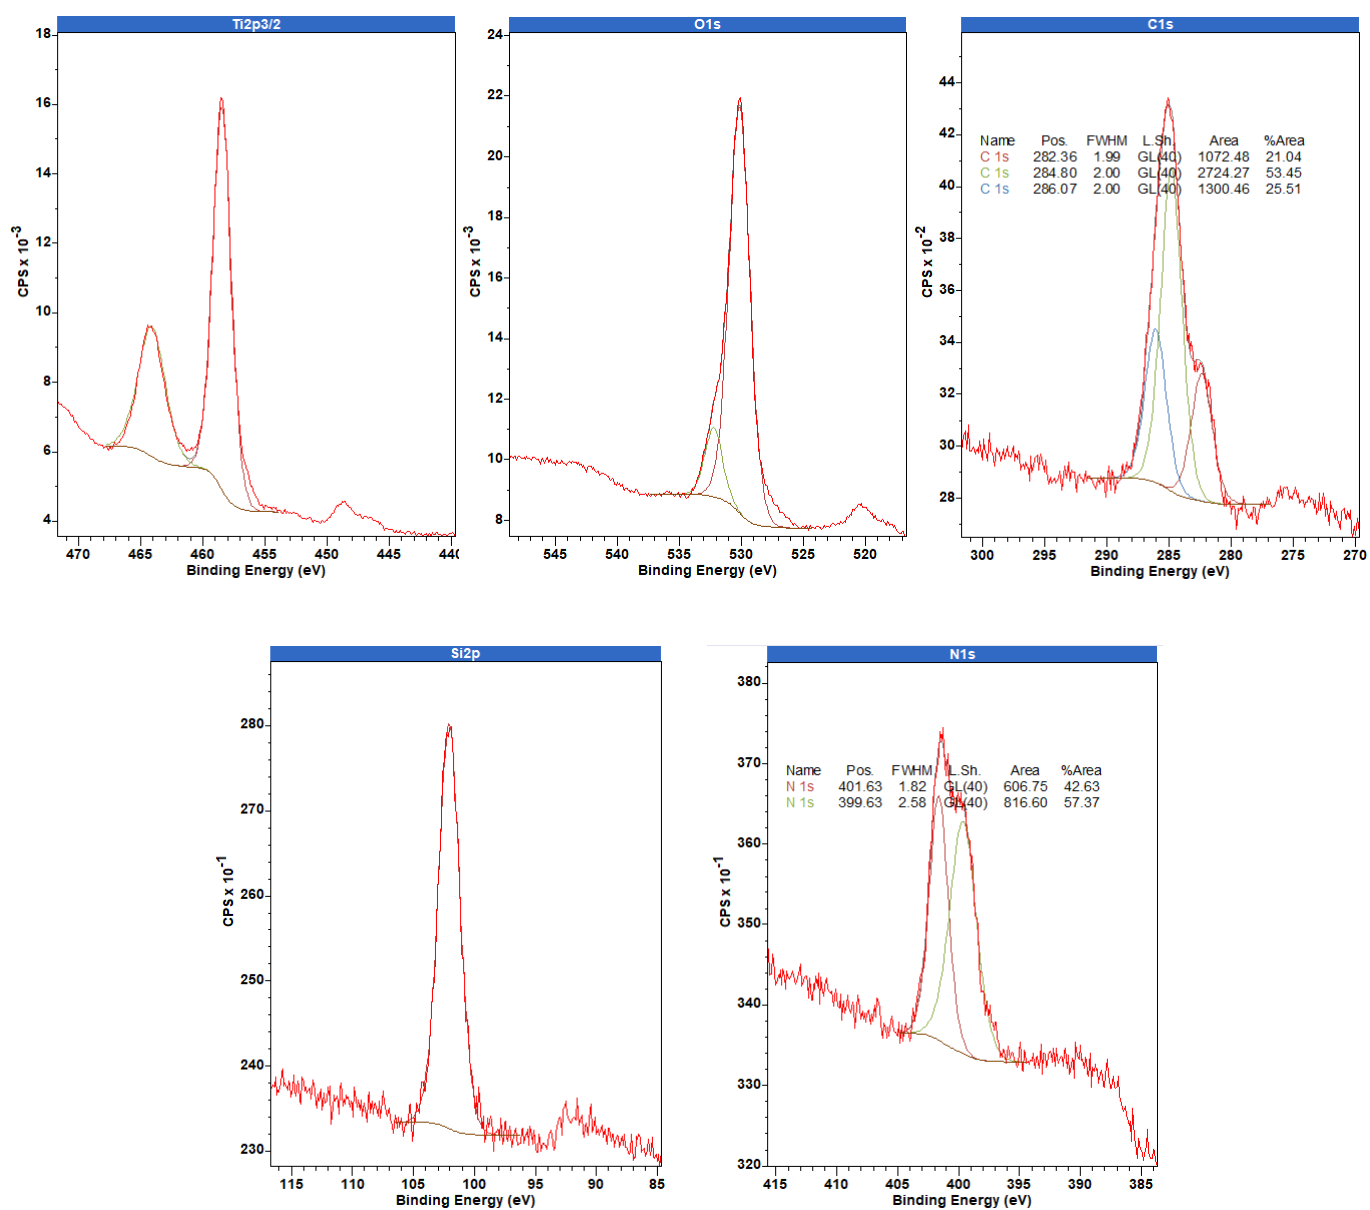

**Figure S8(D)** - XPS spectra with deconvoluted peaks of sample TTNT/APTES-2.7

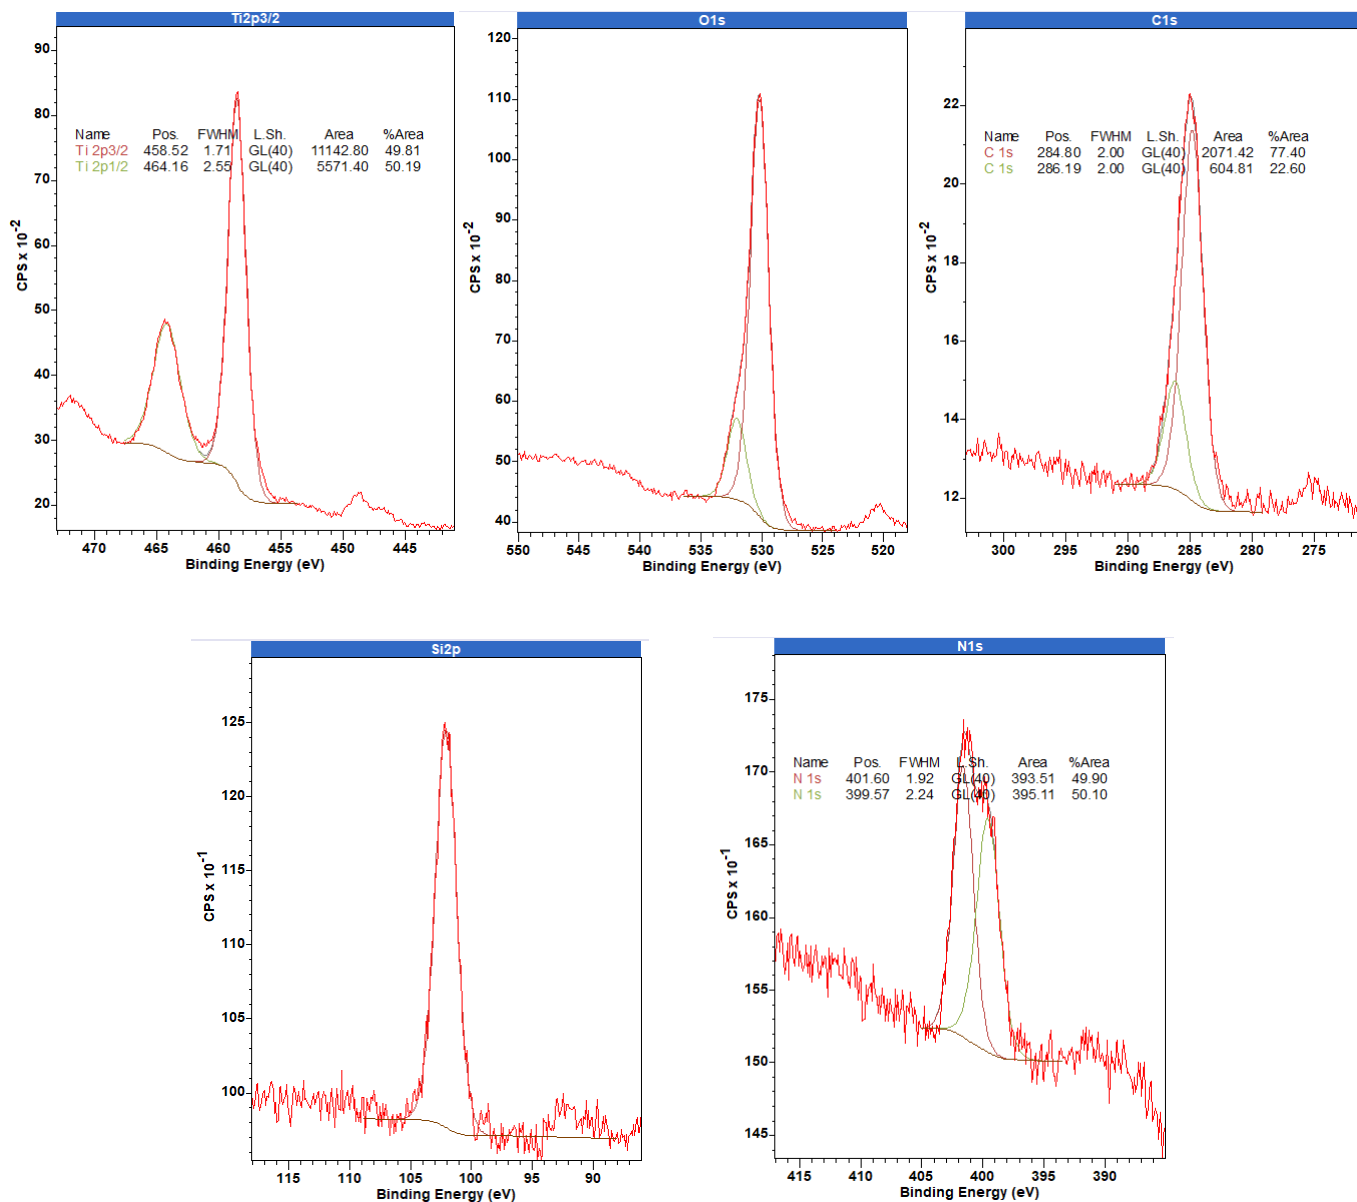

**Figure S8(E)** - XPS spectra with deconvoluted peaks of sample TTNT/APTES-3.1

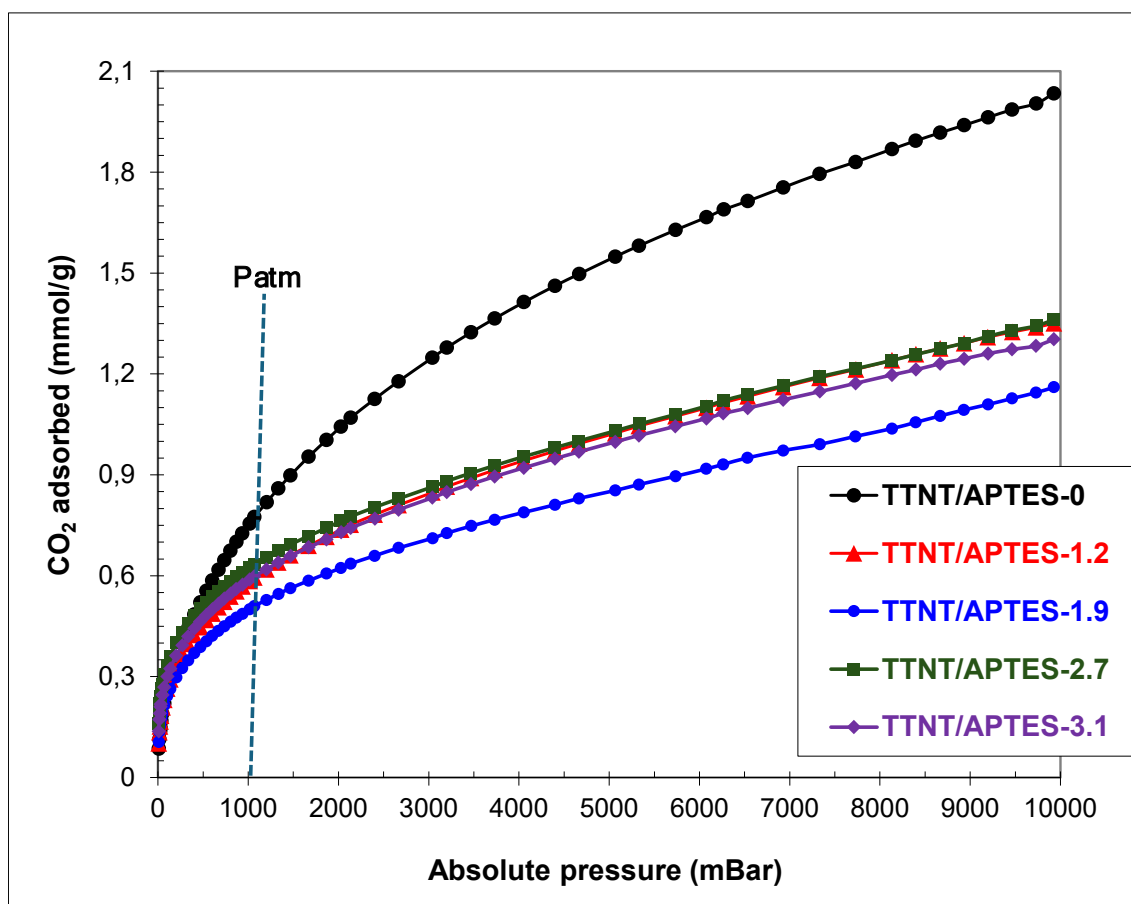

**Figure S9** – Wide pressure range CO<sub>2</sub> adsorption isotherms (23°C) of the samples studied

**Table S1:** CO<sub>2</sub> adsorption capacities of the samples (mmol·g<sup>-1</sup>) at constant low pressures

| <b>Pressão Parcial<br/>(mBar)</b> | <b>0.456 *</b> | <b>1</b> | <b>10</b> |
|-----------------------------------|----------------|----------|-----------|
| TTNT/APTES-0                      | 0.013          | 0.021    | 0.086     |
| TTNT/APTES-1.2                    | 0.026          | 0.038    | 0.111     |
| TTNT/APTES-1.9                    | 0.036          | 0.048    | 0.115     |
| TTNT/APTES-2.7                    | 0.054          | 0.073    | 0.176     |
| TTNT/APTES-3.1                    | 0.046          | 0.062    | 0.149     |

\* *assumed partial pressure of CO<sub>2</sub> in atmosphere (DAC application)*

## Calculation Memory (Mass Losses)

### Molar Mass Ratio, OH/H<sub>2</sub>O

In thermal dehydroxylation, OH groups combine with each other to form water molecules, and the mass loss obtained by TGA is related to this water released as vapor. A stoichiometric ratio must be applied to calculate the mass of OH lost as structural water from both TTNT surface and attached hydrolyzed APTES (if the case).

$$2OH \rightarrow H_2O$$

$$MMR_{OH/H_2O} = \frac{2 * MM_{OH}}{MM_{H_2O}}$$

### Total concentration of -OH in pristine TTNT, C<sub>OH</sub>

The total concentration of OH groups in TTNT before functionalization (C<sub>OH</sub> in mol.g<sup>-1</sup>) is estimated from its mass loss percentage (released as structural water) determined by TGA in the range 200-650°C (ML<sup>-OH TOTAL</sup> – see Table 3), according to the following equation, where MM<sub>H<sub>2</sub>O</sub> is the molar mass of H<sub>2</sub>O.

$$C_{OH} = \frac{ML^{-OH TOTAL}}{100 * MM_{H_2O}} * MMR_{\frac{OH}{H_2O}} = \frac{7.2}{100 * 18.01} *$$

$$= 0,0075 \text{ mol/g}$$

$$= 7.5 \text{ mmol/g}$$

### OH per nm<sup>2</sup> in pristine TTNT

The corresponding amount of OH groups per nm<sup>2</sup> on the TTNT surface is calculated by multiplying the total concentration of OH (C<sub>OH</sub>) by the Avogadro's constant divided by the specific area of the TTNT (BETSA = 271m<sup>2</sup>.g<sup>-1</sup>) converted to nm<sup>2</sup>.g<sup>-1</sup>.

$$\frac{OH}{nm^2} = \frac{C_{OH} * N_A}{BETSA_{TTNT}} * 10^{-18} = 16.77$$

**Calculated mass loss due to dehydroxylation from non-used Ti-OH in grafted samples ( $ML^{-OH TTNT}$ )**

The concentration of -OH due to dehydroxylation from remaining Ti-OH in TTNT surface is calculated by subtracting the mole concentration of incorporated APTES combined with surface hydroxyls through n bonds ( $N_{bonds} \cdot C_{APTES}$  in mol.g<sup>-1</sup>) from the total concentration of -OH in the unfunctionalized sample ( $C_{OH}$  in mol.g<sup>-1</sup>). This is multiplied by the Molar Mass of the hydroxyl group ( $MM_{OH}$ ) divided by the Molar Mass Ratio  $MMR_{OH/H_2O}$  to obtain the corresponding relative mass loss of water released due to dehydroxylation of Ti-OH groups ( $ML^{-OH TTNT}$ ), which is expressed in percentage after multiplying by 100.  $C_{APTES}$  has been determined by chemical analyses (see Table 2) with the value of  $1.05 \cdot 10^{-3}$  mol.g<sup>-1</sup> been considered for the calculations.

$$ML^{-OH TTNT} = \frac{MM_{OH} * (C_{OH} - (N_{bonds} * C_{APTES}))}{MMR_{OH/H_2O}} * 100$$

| N bonds | Bond configuration                                                                  | $ML^{-OH TTNT}$ (%) |
|---------|-------------------------------------------------------------------------------------|---------------------|
| 1       | 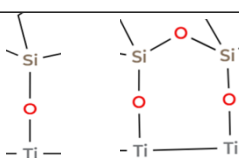 | 5.9                 |
| 2       |  | 4.9                 |
| 3       |  | 4.0                 |



**Calculated mass loss due to dehydroxylation from Si-OH groups in grafted samples ( $ML^{-OH APTES}$ )**

It refers to the concentration of -OH due to dehydroxylation from remaining uncondensed Si-OH in the attached APTES molecules on grafted TTNT, which is directly related to  $C_{APTES}$ , through the following equation, also depending on the binding configuration (Nbonds).

$$ML^{-OH APTES} = (3 - N_{bonds}) * \frac{MM_{-OH} * C_{APTES}}{MMR_{OH/H_2O}} * 100$$

In the case of non-hydrolyzed APTES and in the case of complete hydrolysis with tridentate configuration (3 bonds), the value is zero. In the crosslinking monodentate configuration the  $ML^{-OH APTES}$  is certainly lower than the corresponding anchoring configuration since most of the Si-OH groups underwent internal condensation, but terminal hydroxyls may have remained.  $ML^{-OH APTES}$  may be negligible if polymeric crosslinking (long chains) takes place.

| N bonds                                 | Bond configuration                                                                  | $ML^{-OH APTES}$ (%)                                     |
|-----------------------------------------|-------------------------------------------------------------------------------------|----------------------------------------------------------|
| 1                                       | 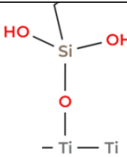 | 1.9                                                      |
| 2                                       |  | 0.9                                                      |
| 3                                       |  | 0.0                                                      |
| 1<br>(crosslinked with<br>terminal -OH) |  | 0.0 – 0.9<br>(nearly zero in long<br>crosslinking chain) |

**Calculated mass loss due to thermal degradation of attached propylamine group in grafted samples ( $ML^{-PrNH_2}$ )**

It refers to the concentration of propylamine groups attached on grafted TTNT, which is directly related to the mole concentration of incorporated APTES ( $C_{APTES}$ ), through the following equation that includes conversion to a percentage.

$$ML^{-PrNH_2} = MM_{-PrNH_2} * C_{APTES} * 100 = 58.102 * (1.0)$$

The value was calculated as 6.1% and it is the same for all binding configurations as long as the concentration of incorporated APTES is constant.

**Calculated mass loss due to thermal degradation of ethoxy groups from APTES in grafted samples ( $ML^{-OEt}$ )**

The mass loss ascribed to thermal degradation of ethoxy groups in non-hydrolyzed and partially hydrolyzed APTES is also directly related to the mole concentration of incorporated APTES ( $C_{APTES}$ ), through the following equation that includes conversion to a percentage and also depends on the binding configuration (Nbonds). In cases with complete hydrolysis of APTES the value of  $ML(-OEt)$  is null.

$$ML^{-OEt} = (3 - Nbonds) * MM_{-OEt} * C_{APTES} * 100$$

| N bonds | Bond configuration                                                                  | $ML^{-OEt}$<br>(%) |
|---------|-------------------------------------------------------------------------------------|--------------------|
| 1       | 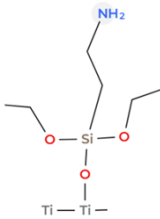 | 9.5                |

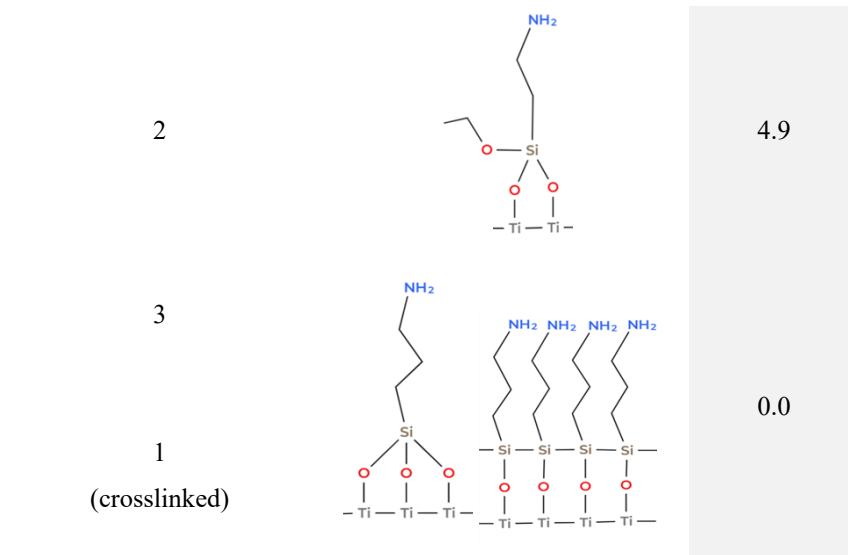

### Total mass loss

$$ML^{200-650} = ML^{-OH\ TTNT} + ML^{-OH\ APTES} + ML^{-PrNH_2} + ML^{-OEt}$$

### List of Symbols

$ML^{200-650}$  = Total mass loss between 200 °C and 650 °C (%)

$ML^X$  = Mass loss of species X (%)

$MM_X$  = Molar Mass of species X in grams per mol

$MMR_{OH/H_2O}$  = Molar Mass Ratio between OH and H<sub>2</sub>O in the water formation, dimensionless

$OH/nm^2$  = Amount of OH groups per nm<sup>2</sup> on the surface of TTNT

$C_0$  = Total concentration of OH groups in TTNT before functionalization in mol per gram

$C_{APTES}$  = Concentration of incorporated APTES in mol per gram

$N_{bonds}$  = Number of bonds between APTES and the TT
